# Supplementary material for: Subcutaneously administered tirzepatide vs semaglutide for adults with type 2 diabetes: a systematic review and network meta-analysis of randomised controlled trials
Source: Springer Nature journal article supplement (doi:10.1007/s00125-024-06144-1), 2024-04-13

## Electronic Supplementary Material (ESM)

|                                                                                                                                                                                           |    |
|-------------------------------------------------------------------------------------------------------------------------------------------------------------------------------------------|----|
| <b>ESM Tables</b> .....                                                                                                                                                                   | 3  |
| <b>ESM Table 1</b> Search strategy .....                                                                                                                                                  | 3  |
| <b>ESM Table 2</b> Risk of bias assessment of included trials for the change from baseline in HbA1c (mmol/mol).....                                                                       | 4  |
| <b>ESM Table 3</b> Risk of bias assessment of included trials for the change from baseline in body weight (kg) .....                                                                      | 5  |
| <b>ESM Table 4</b> Evaluation of heterogeneity (prediction intervals) and inconsistency (incoherence) in the network meta-analysis for the change from baseline in HbA1c (mmol/mol) ..... | 6  |
| <b>ESM Table 5</b> Evaluation of heterogeneity (prediction intervals) and inconsistency (incoherence) in the network meta-analysis for the change from baseline in body weight (kg) ..... | 7  |
| <b>ESM Table 6</b> Network meta-analysis results for the change from baseline in HbA1c (mmol/mol).....                                                                                    | 8  |
| <b>ESM Table 7</b> Network meta-analysis results for the change from baseline in HbA1c (%) .....                                                                                          | 9  |
| <b>ESM Table 8</b> Confidence in effect estimates for the change from baseline in HbA1c (mmol/mol) in comparisons between tirzepatide, semaglutide, and placebo.....                      | 10 |
| <b>ESM Table 9</b> Network meta-analysis results for achievement of an HbA1c target of $\leq 48$ mmol/mol ( $\leq 6.5\%$ ).....                                                           | 11 |
| <b>ESM Table 10</b> Network meta-analysis results for achievement of an HbA1c target of $< 53$ mmol/mol ( $< 7.0\%$ ).....                                                                | 12 |
| <b>ESM Table 11</b> Network meta-analysis results for the change from baseline in body weight (kg) .....                                                                                  | 13 |
| <b>ESM Table 12</b> Confidence in effect estimates for the change from baseline in body weight (kg) in comparisons between tirzepatide to semaglutide to and placebo .....                | 14 |
| <b>ESM Table 13</b> Network meta-analysis results for achievement of at least a 10% body weight reduction .....                                                                           | 15 |
| <b>ESM Table 14</b> Network meta-analysis results for the incidence of nausea .....                                                                                                       | 16 |
| <b>ESM Table 15</b> Network meta-analysis results for the incidence of vomiting .....                                                                                                     | 17 |
| <b>ESM Table 16</b> Network meta-analysis results for the incidence of diarrhoea.....                                                                                                     | 18 |
| <b>ESM Table 17</b> Network meta-analysis results for treatment discontinuation due to gastrointestinal adverse events.....                                                               | 19 |
| <b>ESM Table 18</b> Network meta-analysis results for the incidence of serious adverse events.....                                                                                        | 20 |
| <b>ESM Figures</b> .....                                                                                                                                                                  | 21 |
| <b>ESM Fig. 1</b> PRISMA flow diagram of the study selection process .....                                                                                                                | 21 |
| <b>ESM Fig. 2</b> Assessment of transitivity based on the distribution of mean baseline HbA1c (%).....                                                                                    | 22 |
| <b>ESM Fig. 3</b> Assessment of transitivity based on the distribution of mean baseline body weight (kg)..                                                                                | 23 |
| <b>ESM Fig. 4</b> Comparison-adjusted funnel plot for the change from baseline in HbA1c (mmol/mol) ....                                                                                   | 24 |
| <b>ESM Fig. 5</b> Comparison-adjusted funnel plot for the change from baseline in body weight (kg) .....                                                                                  | 25 |

|                                                                                                                                                                                                                                                                       |    |
|-----------------------------------------------------------------------------------------------------------------------------------------------------------------------------------------------------------------------------------------------------------------------|----|
| <b>ESM Fig. 6</b> Network meta-analysis results compared to placebo for the change from baseline in HbA1c (%). MD, mean difference .....                                                                                                                              | 26 |
| <b>ESM Fig. 7</b> Treatment ranking (P-scores) for the change from baseline in HbA1c (mmol/mol). P-scores range from 0 to 1 to and can be interpreted as an average degree of probability for a treatment to be better than the other treatments in the network.....  | 27 |
| <b>ESM Fig. 8</b> Treatment ranking (P-scores) for the change from baseline in body weight (kg). P-scores range from 0 to 1 to and can be interpreted as an average degree of probability for a treatment to be better than the other treatments in the network ..... | 28 |
| <b>ESM Fig. 9</b> Network meta-analysis results compared to placebo for the incidence of nausea. RR, risk ratio.....                                                                                                                                                  | 29 |
| <b>ESM Fig. 10</b> Network meta-analysis results compared to placebo for the incidence of vomiting. RR, risk ratio.....                                                                                                                                               | 30 |
| <b>ESM Fig. 11</b> Network meta-analysis results compared to placebo for the incidence of diarrhoea. RR, risk ratio.....                                                                                                                                              | 31 |
| <b>ESM Fig. 12</b> Network meta-analysis results compared to placebo for the incidence of serious adverse events. RR, risk ratio.....                                                                                                                                 | 32 |

## **ESM Tables**

### **ESM Table 1** Search strategy

#### **PubMed:**

1. tirzepatide
2. ly3298176
3. ly-3298176
4. semaglutide
5. nn9535
6. nn-9535
7. OR 1-6

#### **Cochrane Library:**

1. (tirzepatide)
2. (ly3298176)
3. (ly-3298176)
4. (semaglutide)
5. (nn9535)
6. (nn-9535)
7. OR 1-6

**ESM Table 2** Risk of bias assessment of included trials for the change from baseline in HbA1c (mmol/mol)

| Study                 | Risk of bias domains  |                                            |                      |                            |                                  |                    |
|-----------------------|-----------------------|--------------------------------------------|----------------------|----------------------------|----------------------------------|--------------------|
|                       | Randomisation process | Deviations from the intended interventions | Missing outcome data | Measurement of the outcome | Selection of the reported result | Overall assessment |
| SUSTAIN 3 [28]        | L                     | L                                          | L                    | L                          | L                                | L                  |
| SUSTAIN 4 [29]        | L                     | L                                          | L                    | L                          | L                                | L                  |
| SUSTAIN 10 [34]       | L                     | L                                          | L                    | L                          | L                                | L                  |
| Davies 2017 [38]      | L                     | H                                          | L                    | L                          | L                                | H                  |
| SUSTAIN FORTE [37]    | L                     | L                                          | L                    | L                          | L                                | L                  |
| SUSTAIN 6 [31]        | L                     | L                                          | L                    | L                          | L                                | L                  |
| SUSTAIN 7 [32]        | L                     | L                                          | L                    | L                          | L                                | L                  |
| SUSTAIN 5 [30]        | L                     | L                                          | L                    | L                          | L                                | L                  |
| SUSTAIN 1 [26]        | L                     | L                                          | L                    | L                          | L                                | L                  |
| SUSTAIN 9 [33]        | L                     | L                                          | L                    | L                          | L                                | L                  |
| SUSTAIN 2 [27]        | L                     | L                                          | L                    | L                          | L                                | L                  |
| SUSTAIN China [36]    | L                     | L                                          | L                    | L                          | L                                | L                  |
| SUSTAIN 11 [35]       | L                     | L                                          | L                    | L                          | L                                | L                  |
| Seino 2017 [40]       | L                     | L                                          | L                    | L                          | L                                | L                  |
| Iijima 2023 [39]      | S                     | S                                          | L                    | L                          | L                                | S                  |
| Takahashi 2023 [41]   | L                     | L                                          | L                    | L                          | L                                | L                  |
| SURPASS-5 [45]        | L                     | L                                          | L                    | L                          | L                                | L                  |
| SURPASS-4 [44]        | L                     | L                                          | L                    | L                          | L                                | L                  |
| Frias 2018 [51]       | L                     | L                                          | L                    | L                          | L                                | L                  |
| SURPASS-2 [6]         | L                     | L                                          | L                    | L                          | L                                | L                  |
| Heise 2022 [7]        | L                     | L                                          | L                    | L                          | L                                | L                  |
| SURPASS J-MONO [49]   | L                     | L                                          | L                    | L                          | L                                | L                  |
| SURPASS J-COMBO [48]  | L                     | L                                          | L                    | L                          | L                                | L                  |
| SURPASS-3 [43]        | L                     | L                                          | L                    | L                          | L                                | L                  |
| SURPASS-1 [42]        | L                     | L                                          | L                    | L                          | L                                | L                  |
| SURPASS-AP-COMBO [47] | L                     | L                                          | L                    | L                          | L                                | L                  |
| SURMOUNT-2 [50]       | L                     | L                                          | L                    | L                          | L                                | L                  |
| SURPASS-6 [46]        | L                     | L                                          | L                    | L                          | L                                | L                  |

H, high risk of bias; L, low risk of bias; S, some concerns

**ESM Table 3** Risk of bias assessment of included trials for the change from baseline in body weight (kg)

| Study                 | Risk of bias domains  |                                            |                      |                            |                                  |                    |
|-----------------------|-----------------------|--------------------------------------------|----------------------|----------------------------|----------------------------------|--------------------|
|                       | Randomisation process | Deviations from the intended interventions | Missing outcome data | Measurement of the outcome | Selection of the reported result | Overall assessment |
| SUSTAIN 3 [28]        | L                     | L                                          | L                    | L                          | L                                | L                  |
| SUSTAIN 4 [29]        | L                     | H                                          | L                    | L                          | L                                | H                  |
| SUSTAIN 10 [34]       | L                     | L                                          | L                    | L                          | L                                | L                  |
| Davies 2017 [38]      | L                     | H                                          | L                    | L                          | L                                | H                  |
| SUSTAIN FORTE [37]    | L                     | L                                          | L                    | L                          | L                                | L                  |
| SUSTAIN 6 [31]        | L                     | L                                          | L                    | L                          | L                                | L                  |
| SUSTAIN 7 [32]        | L                     | L                                          | L                    | L                          | L                                | L                  |
| SUSTAIN 5 [30]        | L                     | L                                          | L                    | L                          | L                                | L                  |
| SUSTAIN 1 [26]        | L                     | L                                          | L                    | L                          | L                                | L                  |
| SUSTAIN 9 [33]        | L                     | L                                          | L                    | L                          | L                                | L                  |
| SUSTAIN 2 [27]        | L                     | L                                          | L                    | L                          | L                                | L                  |
| SUSTAIN China [36]    | L                     | L                                          | L                    | L                          | L                                | L                  |
| SUSTAIN 11 [35]       | L                     | H                                          | L                    | L                          | L                                | H                  |
| Seino 2017 [40]       | L                     | L                                          | L                    | L                          | L                                | L                  |
| Iijima 2023 [39]      | S                     | S                                          | L                    | L                          | L                                | S                  |
| Takahashi 2023 [41]   | L                     | L                                          | L                    | L                          | L                                | L                  |
| SURPASS-5 [45]        | L                     | L                                          | L                    | L                          | L                                | L                  |
| SURPASS-4 [44]        | L                     | H                                          | L                    | L                          | L                                | H                  |
| Frias 2018 [51]       | L                     | L                                          | L                    | L                          | L                                | L                  |
| SURPASS-2 [6]         | L                     | L                                          | L                    | L                          | L                                | L                  |
| Heise 2022 [7]        | L                     | L                                          | L                    | L                          | L                                | L                  |
| SURPASS J-MONO [49]   | L                     | L                                          | L                    | L                          | L                                | L                  |
| SURPASS J-COMBO [48]  | L                     | L                                          | L                    | L                          | L                                | L                  |
| SURPASS-3 [43]        | L                     | H                                          | L                    | L                          | L                                | H                  |
| SURPASS-1 [42]        | L                     | L                                          | L                    | L                          | L                                | L                  |
| SURPASS-AP-COMBO [47] | L                     | H                                          | L                    | L                          | L                                | H                  |
| SURMOUNT-2 [50]       | L                     | L                                          | L                    | L                          | L                                | L                  |
| SURPASS-6 [46]        | L                     | H                                          | L                    | L                          | L                                | H                  |

H, high risk of bias; L, low risk of bias; S, some concerns

**ESM Table 4** Evaluation of heterogeneity (prediction intervals) and inconsistency (incoherence) in the network meta-analysis for the change from baseline in HbA1c (mmol/mol)

| <b>Heterogeneity</b>                             |                                                       |
|--------------------------------------------------|-------------------------------------------------------|
| <b>Comparison</b>                                | <b>Prediction interval (lower limit, upper limit)</b> |
| Placebo:Semaglutide 0.5 mg                       | (7.755, 16.247)                                       |
| Placebo:Semaglutide 1.0 mg                       | (11.110, 19.386)                                      |
| Placebo:Tirzepatide 10 mg                        | (15.958, 24.414)                                      |
| Placebo:Tirzepatide 15 mg                        | (17.408, 25.816)                                      |
| Placebo:Tirzepatide 5 mg                         | (13.349, 21.853)                                      |
| Semaglutide 0.5 mg:Semaglutide 1.0 mg            | (-0.856, 7.350)                                       |
| Semaglutide 1.0 mg:Semaglutide 2.0 mg            | (-3.161, 8.141)                                       |
| Semaglutide 1.0 mg:Tirzepatide 10 mg             | (0.707, 9.168)                                        |
| Semaglutide 1.0 mg:Tirzepatide 15 mg             | (2.158, 10.569)                                       |
| Semaglutide 1.0 mg:Tirzepatide 5 mg              | (-1.892, 6.599)                                       |
| Tirzepatide 10 mg:Tirzepatide 15 mg              | (-2.653, 5.505)                                       |
| Tirzepatide 10 mg:Tirzepatide 5 mg               | (-6.684, 1.515)                                       |
| Tirzepatide 15 mg:Tirzepatide 5 mg               | (-8.105, 0.084)                                       |
| Placebo:Semaglutide 2.0 mg                       | (11.886, 23.590)                                      |
| Semaglutide 0.5 mg:Semaglutide 2.0 mg            | (-0.090, 11.564)                                      |
| Semaglutide 0.5 mg:Tirzepatide 10 mg             | (3.835, 12.534)                                       |
| Semaglutide 0.5 mg:Tirzepatide 15 mg             | (5.283, 13.938)                                       |
| Semaglutide 0.5 mg:Tirzepatide 5 mg              | (1.236, 9.964)                                        |
| Semaglutide 2.0 mg:Tirzepatide 10 mg             | (-3.470, 8.365)                                       |
| Semaglutide 2.0 mg:Tirzepatide 15 mg             | (-2.026, 9.773)                                       |
| Semaglutide 2.0 mg:Tirzepatide 5 mg              | (-6.065, 5.792)                                       |
| <b>Inconsistency (design-by-treatment model)</b> |                                                       |
| Q:                                               | 19.430                                                |
| Degrees of freedom:                              | 28                                                    |
| P value:                                         | 0.884                                                 |

**ESM Table 5** Evaluation of heterogeneity (prediction intervals) and inconsistency (incoherence) in the network meta-analysis for the change from baseline in body weight (kg)

| <b>Heterogeneity</b>                             |                                                       |
|--------------------------------------------------|-------------------------------------------------------|
| <b>Comparison</b>                                | <b>Prediction interval (lower limit, upper limit)</b> |
| Placebo:Semaglutide 0.5 mg                       | (-0.829, 5.863)                                       |
| Placebo:Semaglutide 1.0 mg                       | (0.890, 7.453)                                        |
| Placebo:Tirzepatide 10 mg                        | (4.360, 11.036)                                       |
| Placebo:Tirzepatide 15 mg                        | (6.244, 12.897)                                       |
| Placebo:Tirzepatide 5 mg                         | (1.914, 8.629)                                        |
| Semaglutide 0.5 mg:Semaglutide 1.0 mg            | (-1.599, 4.909)                                       |
| Semaglutide 1.0 mg:Semaglutide 2.0 mg            | (-3.637, 5.237)                                       |
| Semaglutide 1.0 mg:Tirzepatide 10 mg             | (0.172, 6.880)                                        |
| Semaglutide 1.0 mg:Tirzepatide 15 mg             | (2.058, 8.739)                                        |
| Semaglutide 1.0 mg:Tirzepatide 5 mg              | (-2.266, 4.465)                                       |
| Tirzepatide 10 mg:Tirzepatide 15 mg              | (-1.371, 5.116)                                       |
| Tirzepatide 10 mg:Tirzepatide 5 mg               | (-5.685, 0.832)                                       |
| Tirzepatide 15 mg:Tirzepatide 5 mg               | (-7.554, -1.043)                                      |
| Placebo:Semaglutide 2.0 mg                       | (0.397, 9.547)                                        |
| Semaglutide 0.5 mg:Semaglutide 2.0 mg            | (-2.100, 7.010)                                       |
| Semaglutide 0.5 mg:Tirzepatide 10 mg             | (1.756, 8.606)                                        |
| Semaglutide 0.5 mg:Tirzepatide 15 mg             | (3.640, 10.467)                                       |
| Semaglutide 0.5 mg:Tirzepatide 5 mg              | (-0.682, 6.192)                                       |
| Semaglutide 2.0 mg:Tirzepatide 10 mg             | (-1.901, 7.354)                                       |
| Semaglutide 2.0 mg:Tirzepatide 15 mg             | (-0.019, 9.216)                                       |
| Semaglutide 2.0 mg:Tirzepatide 5 mg              | (-4.336, 4.936)                                       |
| <b>Inconsistency (design-by-treatment model)</b> |                                                       |
| Q:                                               | 33.464                                                |
| Degrees of freedom:                              | 28                                                    |
| P value:                                         | 0.219                                                 |

**ESM Table 6** Network meta-analysis results for the change from baseline in HbA1c (mmol/mol)

|                                                                                                                                                                                               |                           |                           |                           |                           |                           |                         |                         |                        |                |
|-----------------------------------------------------------------------------------------------------------------------------------------------------------------------------------------------|---------------------------|---------------------------|---------------------------|---------------------------|---------------------------|-------------------------|-------------------------|------------------------|----------------|
| <b>Tirzepatide 15 mg</b>                                                                                                                                                                      |                           |                           |                           |                           |                           |                         |                         |                        |                |
| -1.43 (-2.74 to -0.11)                                                                                                                                                                        | <b>Tirzepatide 10 mg</b>  |                           |                           |                           |                           |                         |                         |                        |                |
| -3.87 (-8.22 to 0.48)                                                                                                                                                                         | -2.45 (-6.82 to 1.93)     | <b>Semaglutide 2.0 mg</b> |                           |                           |                           |                         |                         |                        |                |
| -4.01 (-5.37 to -2.65)                                                                                                                                                                        | -2.58 (-3.96 to -1.21)    | -0.14 (-4.52 to 4.25)     | <b>Tirzepatide 5 mg</b>   |                           |                           |                         |                         |                        |                |
| -6.36 (-8.01 to -4.72)                                                                                                                                                                        | -4.94 (-6.65 to -3.23)    | -2.49 (-6.52 to 1.54)     | -2.35 (-4.10 to -0.61)    | <b>Semaglutide 1.0 mg</b> |                           |                         |                         |                        |                |
| -9.61 (-11.54 to -7.69)                                                                                                                                                                       | -8.18 (-10.16 to -6.21)   | -5.74 (-9.99 to -1.48)    | -5.60 (-7.60 to -3.60)    | -3.25 (-4.63 to -1.86)    | <b>Semaglutide 0.5 mg</b> |                         |                         |                        |                |
| -11.96 (-14.69 to -9.23)                                                                                                                                                                      | -10.53 (-13.28 to -7.79)  | -8.09 (-12.93 to -3.24)   | -7.95 (-10.71 to -5.19)   | -5.60 (-8.29 to -2.91)    | -2.35 (-5.28 to 0.59)     | <b>Prandial insulin</b> |                         |                        |                |
| -13.75 (-15.63 to -11.87)                                                                                                                                                                     | -12.32 (-14.22 to -10.43) | -9.88 (-14.41 to -5.35)   | -9.74 (-11.65 to -7.83)   | -7.39 (-9.47 to -5.31)    | -4.14 (-6.39 to -1.89)    | -1.79 (-4.87 to 1.29)   | <b>Basal insulin</b>    |                        |                |
| -13.80 (-15.79 to -11.80)                                                                                                                                                                     | -12.37 (-14.40 to -10.34) | -9.92 (-14.29 to -5.56)   | -9.79 (-11.84 to -7.74)   | -7.43 (-9.12 to -5.75)    | -4.19 (-6.01 to -2.37)    | -1.84 (-4.86 to 1.19)   | -0.05 (-2.44 to 2.35)   | <b>GLP-1 RA</b>        |                |
| -21.61 (-23.26 to -19.97)                                                                                                                                                                     | -20.19 (-21.89 to -18.48) | -17.74 (-22.03 to -13.45) | -17.60 (-19.36 to -15.84) | -15.25 (-16.73 to -13.77) | -12.00 (-13.74 to -10.26) | -9.65 (-12.51 to -6.79) | -7.86 (-10.03 to -5.69) | -7.81 (-9.81 to -5.82) | <b>Placebo</b> |
| Treatment estimates are mean differences (MDs) and 95% CIs in the column-defining treatment compared to the row-defining treatment. Values lower than 0 favour the column-defining treatment. |                           |                           |                           |                           |                           |                         |                         |                        |                |



**ESM Table 7** Network meta-analysis results for the change from baseline in HbA1c (%)

|                                                                                                                                                                                               |                          |                         |                           |                           |                           |                         |                        |                        |                |
|-----------------------------------------------------------------------------------------------------------------------------------------------------------------------------------------------|--------------------------|-------------------------|---------------------------|---------------------------|---------------------------|-------------------------|------------------------|------------------------|----------------|
| <b>Tirzepatide 15 mg</b>                                                                                                                                                                      |                          |                         |                           |                           |                           |                         |                        |                        |                |
| -0.12 (-0.23 to -0.01)                                                                                                                                                                        | <b>Tirzepatide 10 mg</b> |                         |                           |                           |                           |                         |                        |                        |                |
| -0.37 (-0.49 to -0.25)                                                                                                                                                                        | -0.25 (-0.37 to -0.13)   | <b>Tirzepatide 5 mg</b> |                           |                           |                           |                         |                        |                        |                |
| -0.38 (-0.75 to -0.01)                                                                                                                                                                        | -0.25 (-0.63 to 0.12)    | -0.01 (-0.38 to 0.37)   | <b>Semaglutide 2.0 mg</b> |                           |                           |                         |                        |                        |                |
| -0.58 (-0.72 to -0.43)                                                                                                                                                                        | -0.45 (-0.60 to -0.31)   | -0.21 (-0.36 to -0.06)  | -0.20 (-0.54 to 0.14)     | <b>Semaglutide 1.0 mg</b> |                           |                         |                        |                        |                |
| -0.88 (-1.04 to -0.71)                                                                                                                                                                        | -0.76 (-0.93 to -0.58)   | -0.51 (-0.68 to -0.33)  | -0.50 (-0.86 to -0.14)    | -0.30 (-0.42 to -0.18)    | <b>Semaglutide 0.5 mg</b> |                         |                        |                        |                |
| -1.03 (-1.26 to -0.80)                                                                                                                                                                        | -0.91 (-1.14 to -0.68)   | -0.66 (-0.89 to -0.43)  | -0.66 (-1.06 to -0.25)    | -0.46 (-0.68 to -0.23)    | -0.15 (-0.40 to 0.09)     | <b>Prandial insulin</b> |                        |                        |                |
| -1.23 (-1.41 to -1.05)                                                                                                                                                                        | -1.11 (-1.29 to -0.93)   | -0.86 (-1.05 to -0.68)  | -0.86 (-1.23 to -0.48)    | -0.66 (-0.80 to -0.51)    | -0.35 (-0.51 to -0.19)    | -0.20 (-0.46 to 0.06)   | <b>GLP-1 RA</b>        |                        |                |
| -1.25 (-1.41 to -1.09)                                                                                                                                                                        | -1.13 (-1.29 to -0.96)   | -0.88 (-1.04 to -0.72)  | -0.87 (-1.26 to -0.49)    | -0.67 (-0.85 to -0.50)    | -0.37 (-0.56 to -0.18)    | -0.22 (-0.47 to 0.04)   | -0.02 (-0.23 to 0.19)  | <b>Basal insulin</b>   |                |
| -1.96 (-2.11 to -1.82)                                                                                                                                                                        | -1.84 (-1.99 to -1.69)   | -1.60 (-1.75 to -1.44)  | -1.59 (-1.95 to -1.22)    | -1.39 (-1.52 to -1.26)    | -1.09 (-1.24 to -0.94)    | -0.93 (-1.17 to -0.69)  | -0.73 (-0.91 to -0.56) | -0.72 (-0.90 to -0.53) | <b>Placebo</b> |
| Treatment estimates are mean differences (MDs) and 95% CIs in the column-defining treatment compared to the row-defining treatment. Values lower than 0 favour the column-defining treatment. |                          |                         |                           |                           |                           |                         |                        |                        |                |

**ESM Table 8** Confidence in effect estimates for the change from baseline in HbA1c (mmol/mol) in comparisons between tirzepatide, semaglutide, and placebo

| Comparison                            | Within-study bias | Reporting bias | Indirectness  | Imprecision   | Heterogeneity  | Incoherence | Confidence rating |
|---------------------------------------|-------------------|----------------|---------------|---------------|----------------|-------------|-------------------|
| Placebo:Semaglutide 0.5 mg            | No concerns       | Low risk       | No concerns   | No concerns   | No concerns    | No concerns | High              |
| Placebo:Semaglutide 1.0 mg            | No concerns       | Low risk       | No concerns   | No concerns   | No concerns    | No concerns | High              |
| Placebo:Tirzepatide 10 mg             | No concerns       | Low risk       | No concerns   | No concerns   | No concerns    | No concerns | High              |
| Placebo:Tirzepatide 15 mg             | No concerns       | Low risk       | No concerns   | No concerns   | No concerns    | No concerns | High              |
| Placebo:Tirzepatide 5 mg              | No concerns       | Low risk       | No concerns   | No concerns   | No concerns    | No concerns | High              |
| Semaglutide 0.5 mg:Semaglutide 1.0 mg | No concerns       | Low risk       | No concerns   | No concerns   | Some concerns  | No concerns | Moderate          |
| Semaglutide 1.0 mg:Semaglutide 2.0 mg | No concerns       | Low risk       | Some concerns | Some concerns | No concerns    | No concerns | Low               |
| Semaglutide 1.0 mg:Tirzepatide 10 mg  | No concerns       | Low risk       | No concerns   | No concerns   | No concerns    | No concerns | High              |
| Semaglutide 1.0 mg:Tirzepatide 15 mg  | No concerns       | Low risk       | No concerns   | No concerns   | No concerns    | No concerns | High              |
| Semaglutide 1.0 mg:Tirzepatide 5 mg   | No concerns       | Low risk       | No concerns   | No concerns   | Some concerns  | No concerns | Moderate          |
| Tirzepatide 10 mg:Tirzepatide 15 mg   | No concerns       | Low risk       | No concerns   | No concerns   | Some concerns  | No concerns | Moderate          |
| Tirzepatide 10 mg:Tirzepatide 5 mg    | No concerns       | Low risk       | No concerns   | No concerns   | Some concerns  | No concerns | Moderate          |
| Tirzepatide 15 mg:Tirzepatide 5 mg    | No concerns       | Low risk       | No concerns   | No concerns   | Some concerns  | No concerns | Moderate          |
| Placebo:Semaglutide 2.0 mg            | No concerns       | Low risk       | Some concerns | No concerns   | No concerns    | No concerns | Moderate          |
| Semaglutide 0.5 mg:Semaglutide 2.0 mg | No concerns       | Low risk       | Some concerns | No concerns   | Some concerns  | No concerns | Low               |
| Semaglutide 0.5 mg:Tirzepatide 10 mg  | No concerns       | Low risk       | No concerns   | No concerns   | No concerns    | No concerns | High              |
| Semaglutide 0.5 mg:Tirzepatide 15 mg  | No concerns       | Low risk       | No concerns   | No concerns   | No concerns    | No concerns | High              |
| Semaglutide 0.5 mg:Tirzepatide 5 mg   | No concerns       | Low risk       | No concerns   | No concerns   | No concerns    | No concerns | High              |
| Semaglutide 2.0 mg:Tirzepatide 10 mg  | No concerns       | Low risk       | Some concerns | Some concerns | No concerns    | No concerns | Low               |
| Semaglutide 2.0 mg:Tirzepatide 15 mg  | No concerns       | Low risk       | Some concerns | Some concerns | No concerns    | No concerns | Low               |
| Semaglutide 2.0 mg:Tirzepatide 5 mg   | No concerns       | Low risk       | Some concerns | No concerns   | Major concerns | No concerns | Very low          |

**ESM Table 9** Network meta-analysis results for achievement of an HbA1c target of  $\leq 48$  mmol/mol ( $\leq 6.5\%$ )

|                                                                                                                                                                                         |                          |                         |                           |                           |                           |                     |                      |                         |                |
|-----------------------------------------------------------------------------------------------------------------------------------------------------------------------------------------|--------------------------|-------------------------|---------------------------|---------------------------|---------------------------|---------------------|----------------------|-------------------------|----------------|
| <b>Tirzepatide 15 mg</b>                                                                                                                                                                |                          |                         |                           |                           |                           |                     |                      |                         |                |
| 1.03 (0.96 to 1.09)                                                                                                                                                                     | <b>Tirzepatide 10 mg</b> |                         |                           |                           |                           |                     |                      |                         |                |
| 1.15 (1.07 to 1.23)                                                                                                                                                                     | 1.12 (1.04 to 1.20)      | <b>Tirzepatide 5 mg</b> |                           |                           |                           |                     |                      |                         |                |
| 0.91 (0.69 to 1.18)                                                                                                                                                                     | 0.88 (0.68 to 1.15)      | 0.79 (0.61 to 1.03)     | <b>Semaglutide 2.0 mg</b> |                           |                           |                     |                      |                         |                |
| 1.22 (1.08 to 1.38)                                                                                                                                                                     | 1.19 (1.05 to 1.34)      | 1.06 (0.94 to 1.20)     | 1.34 (1.06 to 1.70)       | <b>Semaglutide 1.0 mg</b> |                           |                     |                      |                         |                |
| 1.55 (1.35 to 1.80)                                                                                                                                                                     | 1.52 (1.31 to 1.75)      | 1.35 (1.17 to 1.57)     | 1.71 (1.33 to 2.21)       | 1.28 (1.17 to 1.40)       | <b>Semaglutide 0.5 mg</b> |                     |                      |                         |                |
| 2.30 (1.98 to 2.66)                                                                                                                                                                     | 2.24 (1.93 to 2.59)      | 2.00 (1.73 to 2.32)     | 2.53 (1.94 to 3.31)       | 1.88 (1.66 to 2.13)       | 1.48 (1.28 to 1.70)       | <b>GLP-1 RA</b>     |                      |                         |                |
| 2.58 (2.28 to 2.93)                                                                                                                                                                     | 2.52 (2.22 to 2.85)      | 2.25 (1.98 to 2.55)     | 2.85 (2.15 to 3.77)       | 2.12 (1.82 to 2.47)       | 1.66 (1.40 to 1.97)       | 1.13 (0.94 to 1.34) | <b>Basal insulin</b> |                         |                |
| 2.40 (2.02 to 2.86)                                                                                                                                                                     | 2.34 (1.97 to 2.79)      | 2.09 (1.76 to 2.50)     | 2.65 (1.97 to 3.56)       | 1.97 (1.65 to 2.35)       | 1.55 (1.27 to 1.88)       | 1.05 (0.85 to 1.28) | 0.93 (0.76 to 1.14)  | <b>Prandial insulin</b> |                |
| 7.01 (5.73 to 8.57)                                                                                                                                                                     | 6.83 (5.58 to 8.36)      | 6.11 (4.97 to 7.50)     | 7.73 (5.62 to 10.63)      | 5.75 (4.65 to 7.12)       | 4.51 (3.60 to 5.64)       | 3.05 (2.42 to 3.85) | 2.71 (2.16 to 3.41)  | 2.92 (2.26 to 3.77)     | <b>Placebo</b> |
| Treatment estimates are risk ratios (RRs) and 95% CIs in the column-defining treatment compared to the row-defining treatment. RRs greater than 1 favour the column-defining treatment. |                          |                         |                           |                           |                           |                     |                      |                         |                |

**ESM Table 10** Network meta-analysis results for achievement of an HbA1c target of <53 mmol/mol (<7.0%)

|                                                                                                                                                                                         |                          |                         |                           |                           |                           |                     |                      |                         |                |
|-----------------------------------------------------------------------------------------------------------------------------------------------------------------------------------------|--------------------------|-------------------------|---------------------------|---------------------------|---------------------------|---------------------|----------------------|-------------------------|----------------|
| <b>Tirzepatide 15 mg</b>                                                                                                                                                                |                          |                         |                           |                           |                           |                     |                      |                         |                |
| 1.00 (0.96 to 1.05)                                                                                                                                                                     | <b>Tirzepatide 10 mg</b> |                         |                           |                           |                           |                     |                      |                         |                |
| 1.09 (1.03 to 1.14)                                                                                                                                                                     | 1.08 (1.03 to 1.14)      | <b>Tirzepatide 5 mg</b> |                           |                           |                           |                     |                      |                         |                |
| 0.92 (0.77 to 1.11)                                                                                                                                                                     | 0.92 (0.76 to 1.11)      | 0.85 (0.70 to 1.02)     | <b>Semaglutide 2.0 mg</b> |                           |                           |                     |                      |                         |                |
| 1.08 (1.00 to 1.18)                                                                                                                                                                     | 1.08 (0.99 to 1.17)      | 1.00 (0.91 to 1.08)     | 1.17 (0.99 to 1.38)       | <b>Semaglutide 1.0 mg</b> |                           |                     |                      |                         |                |
| 1.25 (1.13 to 1.38)                                                                                                                                                                     | 1.25 (1.13 to 1.38)      | 1.15 (1.04 to 1.27)     | 1.35 (1.13 to 1.62)       | 1.15 (1.08 to 1.23)       | <b>Semaglutide 0.5 mg</b> |                     |                      |                         |                |
| 1.59 (1.44 to 1.76)                                                                                                                                                                     | 1.59 (1.44 to 1.75)      | 1.47 (1.33 to 1.62)     | 1.72 (1.43 to 2.08)       | 1.47 (1.35 to 1.60)       | 1.27 (1.15 to 1.41)       | <b>GLP-1 RA</b>     |                      |                         |                |
| 1.82 (1.67 to 1.98)                                                                                                                                                                     | 1.82 (1.67 to 1.98)      | 1.68 (1.54 to 1.83)     | 1.97 (1.62 to 2.40)       | 1.68 (1.52 to 1.86)       | 1.46 (1.30 to 1.63)       | 1.14 (1.01 to 1.29) | <b>Basal insulin</b> |                         |                |
| 1.73 (1.53 to 1.96)                                                                                                                                                                     | 1.73 (1.53 to 1.96)      | 1.60 (1.41 to 1.81)     | 1.88 (1.53 to 2.31)       | 1.60 (1.42 to 1.81)       | 1.39 (1.21 to 1.59)       | 1.09 (0.95 to 1.25) | 0.95 (0.83 to 1.10)  | <b>Prandial insulin</b> |                |
| 3.70 (3.26 to 4.20)                                                                                                                                                                     | 3.69 (3.25 to 4.19)      | 3.41 (2.99 to 3.88)     | 4.01 (3.24 to 4.95)       | 3.42 (3.00 to 3.90)       | 2.96 (2.57 to 3.41)       | 2.32 (2.01 to 2.69) | 2.03 (1.76 to 2.35)  | 2.13 (1.81 to 2.52)     | <b>Placebo</b> |
| Treatment estimates are risk ratios (RRs) and 95% CIs in the column-defining treatment compared to the row-defining treatment. RRs greater than 1 favour the column-defining treatment. |                          |                         |                           |                           |                           |                     |                      |                         |                |

**ESM Table 11** Network meta-analysis results for the change from baseline in body weight (kg)

|                                                                                                                                                                                               |                          |                         |                           |                           |                           |                        |                        |                       |                         |
|-----------------------------------------------------------------------------------------------------------------------------------------------------------------------------------------------|--------------------------|-------------------------|---------------------------|---------------------------|---------------------------|------------------------|------------------------|-----------------------|-------------------------|
| <b>Tirzepatide 15 mg</b>                                                                                                                                                                      |                          |                         |                           |                           |                           |                        |                        |                       |                         |
| -1.87 (-2.85 to -0.90)                                                                                                                                                                        | <b>Tirzepatide 10 mg</b> |                         |                           |                           |                           |                        |                        |                       |                         |
| -4.30 (-5.31 to -3.29)                                                                                                                                                                        | -2.43 (-3.44 to -1.41)   | <b>Tirzepatide 5 mg</b> |                           |                           |                           |                        |                        |                       |                         |
| -4.60 (-7.94 to -1.26)                                                                                                                                                                        | -2.73 (-6.08 to 0.63)    | -0.30 (-3.67 to 3.07)   | <b>Semaglutide 2.0 mg</b> |                           |                           |                        |                        |                       |                         |
| -5.40 (-6.64 to -4.15)                                                                                                                                                                        | -3.53 (-4.80 to -2.25)   | -1.10 (-2.41 to 0.21)   | -0.80 (-3.90 to 2.30)     | <b>Semaglutide 1.0 mg</b> |                           |                        |                        |                       |                         |
| -7.05 (-8.47 to -5.63)                                                                                                                                                                        | -5.18 (-6.63 to -3.74)   | -2.75 (-4.23 to -1.28)  | -2.46 (-5.72 to 0.81)     | -1.66 (-2.66 to -0.65)    | <b>Semaglutide 0.5 mg</b> |                        |                        |                       |                         |
| -9.04 (-10.51 to -7.58)                                                                                                                                                                       | -7.17 (-8.65 to -5.69)   | -4.74 (-6.25 to -3.24)  | -4.44 (-7.79 to -1.10)    | -3.64 (-4.89 to -2.39)    | -1.99 (-3.31 to -0.66)    | <b>GLP-1 RA</b>        |                        |                       |                         |
| -9.57 (-10.78 to -8.36)                                                                                                                                                                       | -7.70 (-8.94 to -6.46)   | -5.27 (-6.56 to -3.98)  | -4.97 (-8.26 to -1.68)    | -4.17 (-5.26 to -3.09)    | -2.52 (-3.78 to -1.26)    | -0.53 (-1.97 to 0.92)  | <b>Placebo</b>         |                       |                         |
| -12.43 (-13.86 to -11.01)                                                                                                                                                                     | -10.56 (-12.00 to -9.13) | -8.14 (-9.58 to -6.69)  | -7.84 (-11.32 to -4.36)   | -7.04 (-8.61 to -5.46)    | -5.38 (-7.07 to -3.70)    | -3.39 (-5.18 to -1.61) | -2.86 (-4.49 to -1.24) | <b>Basal insulin</b>  |                         |
| -13.42 (-15.51 to -11.33)                                                                                                                                                                     | -11.55 (-13.64 to -9.45) | -9.12 (-11.23 to -7.01) | -8.82 (-12.55 to -5.09)   | -8.02 (-10.09 to -5.95)   | -6.37 (-8.60 to -4.14)    | -4.38 (-6.67 to -2.09) | -3.85 (-6.02 to -1.68) | -0.99 (-3.35 to 1.38) | <b>Prandial insulin</b> |
| Treatment estimates are mean differences (MDs) and 95% CIs in the column-defining treatment compared to the row-defining treatment. Values lower than 0 favour the column-defining treatment. |                          |                         |                           |                           |                           |                        |                        |                       |                         |

**ESM Table 12** Confidence in effect estimates for the change from baseline in in body weight (kg) in comparisons between tirzepatide to semaglutide to and placebo

| Comparison                            | Within-study bias | Reporting bias | Indirectness  | Imprecision   | Heterogeneity | Incoherence    | Confidence rating |
|---------------------------------------|-------------------|----------------|---------------|---------------|---------------|----------------|-------------------|
| Placebo:Semaglutide 0.5 mg            | No concerns       | Low risk       | No concerns   | No concerns   | Some concerns | No concerns    | Moderate          |
| Placebo:Semaglutide 1.0 mg            | No concerns       | Low risk       | No concerns   | No concerns   | No concerns   | No concerns    | High              |
| Placebo:Tirzepatide 10 mg             | No concerns       | Low risk       | No concerns   | No concerns   | No concerns   | No concerns    | High              |
| Placebo:Tirzepatide 15 mg             | No concerns       | Low risk       | No concerns   | No concerns   | No concerns   | No concerns    | High              |
| Placebo:Tirzepatide 5 mg              | No concerns       | Low risk       | No concerns   | No concerns   | No concerns   | No concerns    | High              |
| Semaglutide 0.5 mg:Semaglutide 1.0 mg | No concerns       | Low risk       | No concerns   | No concerns   | Some concerns | No concerns    | Moderate          |
| Semaglutide 1.0 mg:Semaglutide 2.0 mg | No concerns       | Low risk       | Some concerns | No concerns   | Some concerns | No concerns    | Low               |
| Semaglutide 1.0 mg:Tirzepatide 10 mg  | Some concerns     | Low risk       | No concerns   | No concerns   | No concerns   | No concerns    | Moderate          |
| Semaglutide 1.0 mg:Tirzepatide 15 mg  | No concerns       | Low risk       | No concerns   | No concerns   | No concerns   | No concerns    | High              |
| Semaglutide 1.0 mg:Tirzepatide 5 mg   | Some concerns     | Low risk       | No concerns   | No concerns   | No concerns   | No concerns    | Moderate          |
| Tirzepatide 10 mg:Tirzepatide 15 mg   | Some concerns     | Low risk       | No concerns   | No concerns   | Some concerns | No concerns    | Low               |
| Tirzepatide 10 mg:Tirzepatide 5 mg    | Some concerns     | Low risk       | No concerns   | No concerns   | Some concerns | No concerns    | Low               |
| Tirzepatide 15 mg:Tirzepatide 5 mg    | Some concerns     | Low risk       | No concerns   | No concerns   | No concerns   | Major concerns | Low               |
| Placebo:Semaglutide 2.0 mg            | No concerns       | Low risk       | Some concerns | No concerns   | No concerns   | No concerns    | Moderate          |
| Semaglutide 0.5 mg:Semaglutide 2.0 mg | No concerns       | Low risk       | Some concerns | Some concerns | No concerns   | No concerns    | Low               |
| Semaglutide 0.5 mg:Tirzepatide 10 mg  | No concerns       | Low risk       | No concerns   | No concerns   | No concerns   | No concerns    | High              |
| Semaglutide 0.5 mg:Tirzepatide 15 mg  | No concerns       | Low risk       | No concerns   | No concerns   | No concerns   | No concerns    | High              |
| Semaglutide 0.5 mg:Tirzepatide 5 mg   | Some concerns     | Low risk       | No concerns   | No concerns   | Some concerns | No concerns    | Low               |
| Semaglutide 2.0 mg:Tirzepatide 10 mg  | No concerns       | Low risk       | Some concerns | Some concerns | No concerns   | No concerns    | Low               |
| Semaglutide 2.0 mg:Tirzepatide 15 mg  | No concerns       | Low risk       | Some concerns | No concerns   | Some concerns | No concerns    | Low               |
| Semaglutide 2.0 mg:Tirzepatide 5 mg   | No concerns       | Low risk       | Some concerns | No concerns   | Some concerns | No concerns    | Low               |

**ESM Table 13** Network meta-analysis results for achievement of at least a 10% body weight reduction

|                                                                                                                                                                                        |                          |                         |                           |                           |                           |                     |                      |                         |                |
|----------------------------------------------------------------------------------------------------------------------------------------------------------------------------------------|--------------------------|-------------------------|---------------------------|---------------------------|---------------------------|---------------------|----------------------|-------------------------|----------------|
| <b>Tirzepatide 15 mg</b>                                                                                                                                                               |                          |                         |                           |                           |                           |                     |                      |                         |                |
| 1.19 (1.09 to 1.30)                                                                                                                                                                    | <b>Tirzepatide 10 mg</b> |                         |                           |                           |                           |                     |                      |                         |                |
| 1.85 (1.67 to 2.05)                                                                                                                                                                    | 1.56 (1.40 to 1.73)      | <b>Tirzepatide 5 mg</b> |                           |                           |                           |                     |                      |                         |                |
| 1.76 (1.21 to 2.55)                                                                                                                                                                    | 1.48 (1.01 to 2.15)      | 0.95 (0.65 to 1.38)     | <b>Semaglutide 2.0 mg</b> |                           |                           |                     |                      |                         |                |
| 2.20 ( 1.77 to 2.72)                                                                                                                                                                   | 1.85 (1.49 to 2.29)      | 1.19 (0.95 to 1.48)     | 1.25 (0.92 to 1.70)       | <b>Semaglutide 1.0 mg</b> |                           |                     |                      |                         |                |
| 4.39 (3.32 to 5.80)                                                                                                                                                                    | 3.69 (2.79 to 4.88)      | 2.37 (1.78 to 3.15)     | 2.50 (1.74 to 3.59)       | 2.00 (1.65 to 2.42)       | <b>Semaglutide 0.5 mg</b> |                     |                      |                         |                |
| 10.32 ( 7.51 to 14.19)                                                                                                                                                                 | 8.68 (6.31 to 11.94)     | 5.58 (4.04 to 7.70)     | 5.88 (3.91 to 8.84)       | 4.70 (3.59 to 6.15)       | 2.35 (1.72 to 3.21)       | <b>GLP-1 RA</b>     |                      |                         |                |
| 32.03 (22.18 to 46.27)                                                                                                                                                                 | 26.94 (18.63 to 38.93)   | 17.30 (11.93 to 25.08)  | 18.25 (11.01 to 30.23)    | 14.59 (9.77 to 21.79)     | 7.30 (4.73 to 11.28)      | 3.10 (1.94 to 4.95) | <b>Basal insulin</b> |                         |                |
| 15.01 (10.47 to 21.53)                                                                                                                                                                 | 12.62 (8.80 to 18.12)    | 8.11 (5.63 to 11.67)    | 8.55 ( 5.16 to 14.17)     | 6.84 (4.58 to 10.21)      | 3.42 (2.20 to 5.31)       | 1.45 (0.91 to 2.32) | 0.47 (0.28 to 0.78)  | <b>Prandial insulin</b> |                |
| 10.51 (7.55 to 14.64)                                                                                                                                                                  | 8.84 (6.35 to 12.32)     | 5.68 (4.04 to 7.98)     | 5.99 (3.73 to 9.61)       | 4.79 (3.34 to 6.87)       | 2.40 (1.61 to 3.57)       | 1.02 (0.66 to 1.57) | 0.33 (0.20 to 0.53)  | 0.70 (0.43 to 1.13)     | <b>Placebo</b> |
| Treatment estimates are risk ratios (RRs) and 95% CIs in the column-defining treatment compared to the row-defining treatment. RRs greater than 1 favour the column-defining treatment |                          |                         |                           |                           |                           |                     |                      |                         |                |

**ESM Table 14** Network meta-analysis results for the incidence of nausea

|                                                                                                                                                                                      |                          |                         |                           |                           |                           |                       |                      |                         |                |
|--------------------------------------------------------------------------------------------------------------------------------------------------------------------------------------|--------------------------|-------------------------|---------------------------|---------------------------|---------------------------|-----------------------|----------------------|-------------------------|----------------|
| <b>Tirzepatide 15 mg</b>                                                                                                                                                             |                          |                         |                           |                           |                           |                       |                      |                         |                |
| 1.17 (1.02 to 1.34)                                                                                                                                                                  | <b>Tirzepatide 10 mg</b> |                         |                           |                           |                           |                       |                      |                         |                |
| 1.69 (1.45 to 1.98)                                                                                                                                                                  | 1.45 (1.23 to 1.70)      | <b>Tirzepatide 5 mg</b> |                           |                           |                           |                       |                      |                         |                |
| 1.25 (0.79 to 1.97)                                                                                                                                                                  | 1.07 (0.68 to 1.69)      | 0.74 (0.47 to 1.17)     | <b>Semaglutide 2.0 mg</b> |                           |                           |                       |                      |                         |                |
| 1.24 (1.00 to 1.53)                                                                                                                                                                  | 1.06 (0.85 to 1.31)      | 0.73 (0.58 to 0.92)     | 0.99 (0.66 to 1.48)       | <b>Semaglutide 1.0 mg</b> |                           |                       |                      |                         |                |
| 1.43 (1.12 to 1.83)                                                                                                                                                                  | 1.22 (0.95 to 1.57)      | 0.85 (0.65 to 1.10)     | 1.14 (0.74 to 1.76)       | 1.16 (0.99 to 1.35)       | <b>Semaglutide 0.5 mg</b> |                       |                      |                         |                |
| 1.86 (1.44 to 2.40)                                                                                                                                                                  | 1.58 (1.22 to 2.06)      | 1.10 (0.84 to 1.44)     | 1.48 (0.95 to 2.32)       | 1.50 (.23 to 1.83)        | 1.30 (1.03 to 1.63)       | <b>GLP-1 RA</b>       |                      |                         |                |
| 9.93 (7.13 to 13.81)                                                                                                                                                                 | 8.47 (6.07 to 11.83)     | 5.86 (4.17 to 8.24)     | 7.93 (4.65 to 13.52)      | 8.03 (5.65 to 11.40)      | 6.93 (4.81 to 10.00)      | 5.35 (3.64 to 7.85)   | <b>Basal insulin</b> |                         |                |
| 22.19 (12.77 to 38.59)                                                                                                                                                               | 18.95 (10.88 to 33.01)   | 13.11 (7.49 to 22.93)   | 17.73 (8.96 to 35.10)     | 17.95 (10.34 to 31.17)    | 15.50 (8.78 to 27.39)     | 11.96 (6.71 to 21.31) | 2.24 (1.19 to 4.19)  | <b>Prandial insulin</b> |                |
| 3.51 (2.72 to 4.51)                                                                                                                                                                  | 2.99 (2.31 to 3.87)      | 2.07 (1.58 to 2.71)     | 2.80 (1.77 to 4.42)       | 2.84 (2.29 to 3.52)       | 2.45 (1.94 to 3.09)       | 1.89 (1.43 to 2.49)   | 0.35 (0.24 to 0.52)  | 0.16 (0.09 to 0.28)     | <b>Placebo</b> |
| Treatment estimates are risk ratios (RRs) and 95% CIs in the column-defining treatment compared to the row-defining treatment. RRs lower than 1 favour the column-defining treatment |                          |                         |                           |                           |                           |                       |                      |                         |                |



**ESM Table 15** Network meta-analysis results for the incidence of vomiting

|                                                                                                                                                                                      |                          |                         |                           |                           |                           |                      |                      |                         |                |
|--------------------------------------------------------------------------------------------------------------------------------------------------------------------------------------|--------------------------|-------------------------|---------------------------|---------------------------|---------------------------|----------------------|----------------------|-------------------------|----------------|
| <b>Tirzepatide 15 mg</b>                                                                                                                                                             |                          |                         |                           |                           |                           |                      |                      |                         |                |
| 1.20 (1.02 to 1.42)                                                                                                                                                                  | <b>Tirzepatide 10 mg</b> |                         |                           |                           |                           |                      |                      |                         |                |
| 1.82 (1.49 to 2.23)                                                                                                                                                                  | 1.52 (1.23 to 1.87)      | <b>Tirzepatide 5 mg</b> |                           |                           |                           |                      |                      |                         |                |
| 1.20 (0.71 to 2.04)                                                                                                                                                                  | 1.00 (0.59 to 1.70)      | 0.66 (0.38 to 1.14)     | <b>Semaglutide 2.0 mg</b> |                           |                           |                      |                      |                         |                |
| 1.39 (1.07 to 1.82)                                                                                                                                                                  | 1.16 (0.88 to 1.52)      | 0.77 (0.57 to 1.03)     | 1.16 (0.73 to 1.83)       | <b>Semaglutide 1.0 mg</b> |                           |                      |                      |                         |                |
| 1.87 (1.39 to 2.53)                                                                                                                                                                  | 1.56 (1.15 to 2.12)      | 1.03 (0.74 to 1.43)     | 1.56 (0.96 to 2.53)       | 1.34 (1.14 to 1.59)       | <b>Semaglutide 0.5 mg</b> |                      |                      |                         |                |
| 2.17 (1.53 to 3.06)                                                                                                                                                                  | 1.80 (1.27 to 2.56)      | 1.19 (0.82 to 1.72)     | 1.80 (1.07 to 3.03)       | 1.55 (1.21 to 2.00)       | 1.16 (0.87 to 1.53)       | <b>GLP-1 RA</b>      |                      |                         |                |
| 6.02 (4.13 to 8.78)                                                                                                                                                                  | 5.01 (3.43 to 7.33)      | 3.30 (2.22 to 4.92)     | 5.01 (2.73 to 9.17)       | 4.32 (2.90 to 6.43)       | 3.21 (2.12 to 4.88)       | 2.78 (1.76 to 4.40)  | <b>Basal insulin</b> |                         |                |
| 16.30 (8.14 to 32.65)                                                                                                                                                                | 13.57 (6.75 to 27.28)    | 8.95 (4.41 to 18.16)    | 13.55 (5.95 to 30.89)     | 11.70 (5.89 to 23.23)     | 8.70 (4.30 to 17.59)      | 7.53 (3.64 to 15.56) | 2.71 (1.26 to 5.83)  | <b>Prandial insulin</b> |                |
| 4.36 (3.20 to 5.93)                                                                                                                                                                  | 3.63 (2.65 to 4.97)      | 2.39 (1.71 to 3.35)     | 3.62 (2.18 to 6.01)       | 3.13 (2.50 to 3.90)       | 2.33 (1.82 to 2.97)       | 2.01 (1.45 to 2.79)  | 0.72 (0.47 to 1.12)  | 0.27 (0.13 to 0.55)     | <b>Placebo</b> |
| Treatment estimates are risk ratios (RRs) and 95% CIs in the column-defining treatment compared to the row-defining treatment. RRs lower than 1 favour the column-defining treatment |                          |                         |                           |                           |                           |                      |                      |                         |                |

**ESM Table 16** Network meta-analysis results for the incidence of diarrhoea

|                                                                                                                                                                                      |                          |                         |                           |                           |                           |                     |                      |                         |                |
|--------------------------------------------------------------------------------------------------------------------------------------------------------------------------------------|--------------------------|-------------------------|---------------------------|---------------------------|---------------------------|---------------------|----------------------|-------------------------|----------------|
| <b>Tirzepatide 15 mg</b>                                                                                                                                                             |                          |                         |                           |                           |                           |                     |                      |                         |                |
| 0.99 (0.86 to 1.13)                                                                                                                                                                  | <b>Tirzepatide 10 mg</b> |                         |                           |                           |                           |                     |                      |                         |                |
| 1.19 (1.03 to 1.38)                                                                                                                                                                  | 1.21 (1.04 to 1.40)      | <b>Tirzepatide 5 mg</b> |                           |                           |                           |                     |                      |                         |                |
| 1.20 (0.73 to 1.98)                                                                                                                                                                  | 1.22 (0.73 to 2.01)      | 1.01 (0.61 to 1.67)     | <b>Semaglutide 2.0 mg</b> |                           |                           |                     |                      |                         |                |
| 1.29 (1.04 to 1.59)                                                                                                                                                                  | 1.31 (1.05 to 1.62)      | 1.08 (0.87 to 1.35)     | 1.07 (0.68 to 1.69)       | <b>Semaglutide 1.0 mg</b> |                           |                     |                      |                         |                |
| 1.30 (1.02 to 1.65)                                                                                                                                                                  | 1.31 (1.03 to 1.68)      | 1.09 (0.84 to 1.40)     | 1.08 (0.67 to 1.75)       | 1.01 (0.86 to 1.17)       | <b>Semaglutide 0.5 mg</b> |                     |                      |                         |                |
| 1.63 (1.24 to 2.14)                                                                                                                                                                  | 1.65 (1.26 to 2.18)      | 1.37 (1.04 to 1.81)     | 1.36 (0.82 to 2.25)       | 1.27 (1.02 to 1.57)       | 1.26 (0.99 to 1.61)       | <b>GLP-1 RA</b>     |                      |                         |                |
| 5.00 (3.81 to 6.56)                                                                                                                                                                  | 5.06 (3.85 to 6.66)      | 4.20 (3.17 to 5.55)     | 4.16 (2.41 to 7.19)       | 3.88 (2.87 to 5.25)       | 3.86 (2.80 to 5.31)       | 3.06 (2.15 to 4.35) | <b>Basal insulin</b> |                         |                |
| 4.48 (3.02 to 6.63)                                                                                                                                                                  | 4.53 (3.06 to 6.72)      | 3.76 (2.53 to 5.59)     | 3.73 (2.06 to 6.76)       | 3.47 (2.37 to 5.09)       | 3.45 (2.30 to 5.19)       | 2.74 (1.78 to 4.22) | 0.90 (0.57 to 1.41)  | <b>Prandial insulin</b> |                |
| 2.16 (1.71 to 2.72)                                                                                                                                                                  | 2.18 (1.73 to 2.76)      | 1.81 (1.42 to 2.32)     | 1.80 (1.09 to 2.95)       | 1.67 (1.37 to 2.04)       | 1.66 (1.34 to 2.07)       | 1.32 (1.00 to 1.74) | 0.43 (0.31 to 0.60)  | 0.48 (0.32 to 0.73)     | <b>Placebo</b> |
| Treatment estimates are risk ratios (RRs) and 95% CIs in the column-defining treatment compared to the row-defining treatment. RRs lower than 1 favour the column-defining treatment |                          |                         |                           |                           |                           |                     |                      |                         |                |

**ESM Table 17** Network meta-analysis results for treatment discontinuation due to gastrointestinal adverse events

|                                                                                                                                                                                      |                          |                         |                           |                           |                           |                        |                      |                         |                |
|--------------------------------------------------------------------------------------------------------------------------------------------------------------------------------------|--------------------------|-------------------------|---------------------------|---------------------------|---------------------------|------------------------|----------------------|-------------------------|----------------|
| <b>Tirzepatide 15 mg</b>                                                                                                                                                             |                          |                         |                           |                           |                           |                        |                      |                         |                |
| 1.21 (0.92 to 1.58)                                                                                                                                                                  | <b>Tirzepatide 10 mg</b> |                         |                           |                           |                           |                        |                      |                         |                |
| 1.67 (1.23 to 2.27)                                                                                                                                                                  | 1.38 (1.00 to 1.90)      | <b>Tirzepatide 5 mg</b> |                           |                           |                           |                        |                      |                         |                |
| 1.20 (0.48 to 2.96)                                                                                                                                                                  | 0.99 (0.40 to 2.46)      | 0.72 (0.29 to 1.80)     | <b>Semaglutide 2.0 mg</b> |                           |                           |                        |                      |                         |                |
| 1.47 (0.85 to 2.55)                                                                                                                                                                  | 1.22 (0.70 to 2.13)      | 0.89 (0.50 to 1.57)     | 1.23 (0.60 to 2.54)       | <b>Semaglutide 1.0 mg</b> |                           |                        |                      |                         |                |
| 2.14 (1.19 to 3.83)                                                                                                                                                                  | 1.77 (0.98 to 3.21)      | 1.28 (0.70 to 2.36)     | 1.79 (0.84 to 3.80)       | 1.45 (1.15 to 1.82)       | <b>Semaglutide 0.5 mg</b> |                        |                      |                         |                |
| 3.14 (1.65 to 4.96)                                                                                                                                                                  | 2.60 (1.36 to 4.98)      | 1.88 (0.97 to 3.65)     | 2.63 (1.17 to 5.88)       | 2.13 (1.48 to 3.06)       | 1.47 (0.99 to 2.19)       | <b>GLP-1 RA</b>        |                      |                         |                |
| 36.66 (10.39 to 129.38)                                                                                                                                                              | 30.36 (8.58 to 107.34)   | 22.00 (6.17 to 78.49)   | 30.66 (6.82 to 137.83)    | 24.86 (6.65 to 92.96)     | 17.17 (4.53 to 65.10)     | 11.68 (2.99 to 45.56)  | <b>Basal insulin</b> |                         |                |
| 45.72 (2.60 to 804.23)                                                                                                                                                               | 37.86 (2.15 to 667.29)   | 27.44 (1.55 to 485.10)  | 38.23 (2.09 to 698.65)    | 31.00 (1.86 to 517.28)    | 21.41 (1.27 to 360.54)    | 14.57 (0.85 to 248.74) | 1.25 (0.06 to 27.92) | <b>Prandial insulin</b> |                |
| 10.65 (5.58 to 20.35)                                                                                                                                                                | 8.82 (4.56 to 17.04)     | 6.39 (3.26 to 12.52)    | 8.91 (3.82 to 20.74)      | 7.22 (4.64 to 11.23)      | 4.99 (3.14 to 7.92)       | 3.39 (1.93 to 5.96)    | 0.29 (0.07 to 1.14)  | 0.23 (0.01 to 4.02)     | <b>Placebo</b> |
| Treatment estimates are risk ratios (RRs) and 95% CIs in the column-defining treatment compared to the row-defining treatment. RRs lower than 1 favour the column-defining treatment |                          |                         |                           |                           |                           |                        |                      |                         |                |

**ESM Table 18** Network meta-analysis results for the incidence of serious adverse events

|                                                                                                                                                                                      |                          |                         |                           |                           |                           |                     |                      |                         |                |
|--------------------------------------------------------------------------------------------------------------------------------------------------------------------------------------|--------------------------|-------------------------|---------------------------|---------------------------|---------------------------|---------------------|----------------------|-------------------------|----------------|
| <b>Tirzepatide 15 mg</b>                                                                                                                                                             |                          |                         |                           |                           |                           |                     |                      |                         |                |
| 1.04 (0.84 to 1.29)                                                                                                                                                                  | <b>Tirzepatide 10 mg</b> |                         |                           |                           |                           |                     |                      |                         |                |
| 1.00 (0.79 to 1.26)                                                                                                                                                                  | 0.96 (0.76 to 1.21)      | <b>Tirzepatide 5 mg</b> |                           |                           |                           |                     |                      |                         |                |
| 1.20 (0.60 to 2.39)                                                                                                                                                                  | 1.15 (0.58 to 2.29)      | 1.20 (0.60 to 2.40)     | <b>Semaglutide 2.0 mg</b> |                           |                           |                     |                      |                         |                |
| 1.01 (0.75 to 1.35)                                                                                                                                                                  | 0.97 (0.72 to 1.29)      | 1.01 (0.75 to 1.36)     | 0.84 (0.45 to 1.57)       | <b>Semaglutide 1.0 mg</b> |                           |                     |                      |                         |                |
| 0.99 (0.72 to 1.36)                                                                                                                                                                  | 0.95 (0.69 to 1.31)      | 0.99 (0.71 to 1.38)     | 0.83 (0.43 to 1.60)       | 0.98 (0.81 to 1.20)       | <b>Semaglutide 0.5 mg</b> |                     |                      |                         |                |
| 0.93 (0.64 to 1.34)                                                                                                                                                                  | 0.89 (0.62 to 1.28)      | 0.93 (0.64 to 1.35)     | 0.77 (0.39 to 1.54)       | 0.92 (0.69 to 1.23)       | 0.93 (0.68 to 1.29)       | <b>GLP-1 RA</b>     |                      |                         |                |
| 0.88 (0.69 to 1.13)                                                                                                                                                                  | 0.85 (0.66 to 1.09)      | 0.88 (0.68 to 1.14)     | 0.74 (0.37 to 1.49)       | 0.88 (0.64 to 1.20)       | 0.89 (0.63 to 1.25)       | 0.95 (0.64 to 1.41) | <b>Basal insulin</b> |                         |                |
| 0.67 (0.47 to 0.94)                                                                                                                                                                  | 0.64 (0.46 to 0.91)      | 0.67 (0.47 to 0.95)     | 0.56 (0.28 to 1.13)       | 0.66 (0.48 to 0.91)       | 0.68 (0.47 to 0.97)       | 0.72 (0.48 to 1.09) | 0.76 (0.52 to 1.11)  | <b>Prandial insulin</b> |                |
| 0.95 (0.70 to 1.28)                                                                                                                                                                  | 0.91 (0.67 to 1.23)      | 0.95 (0.69 to 1.30)     | 0.79 (0.41 to 1.54)       | 0.94 (0.76 to 1.17)       | 0.96 (0.76 to 1.21)       | 1.02 (0.73 to 1.44) | 1.08 (0.77 to 1.50)  | 1.42 (0.99 to 2.03)     | <b>Placebo</b> |
| Treatment estimates are risk ratios (RRs) and 95% CIs in the column-defining treatment compared to the row-defining treatment. RRs lower than 1 favour the column-defining treatment |                          |                         |                           |                           |                           |                     |                      |                         |                |

## ESM Figures

ESM Fig. 1 PRISMA flow diagram of the study selection process

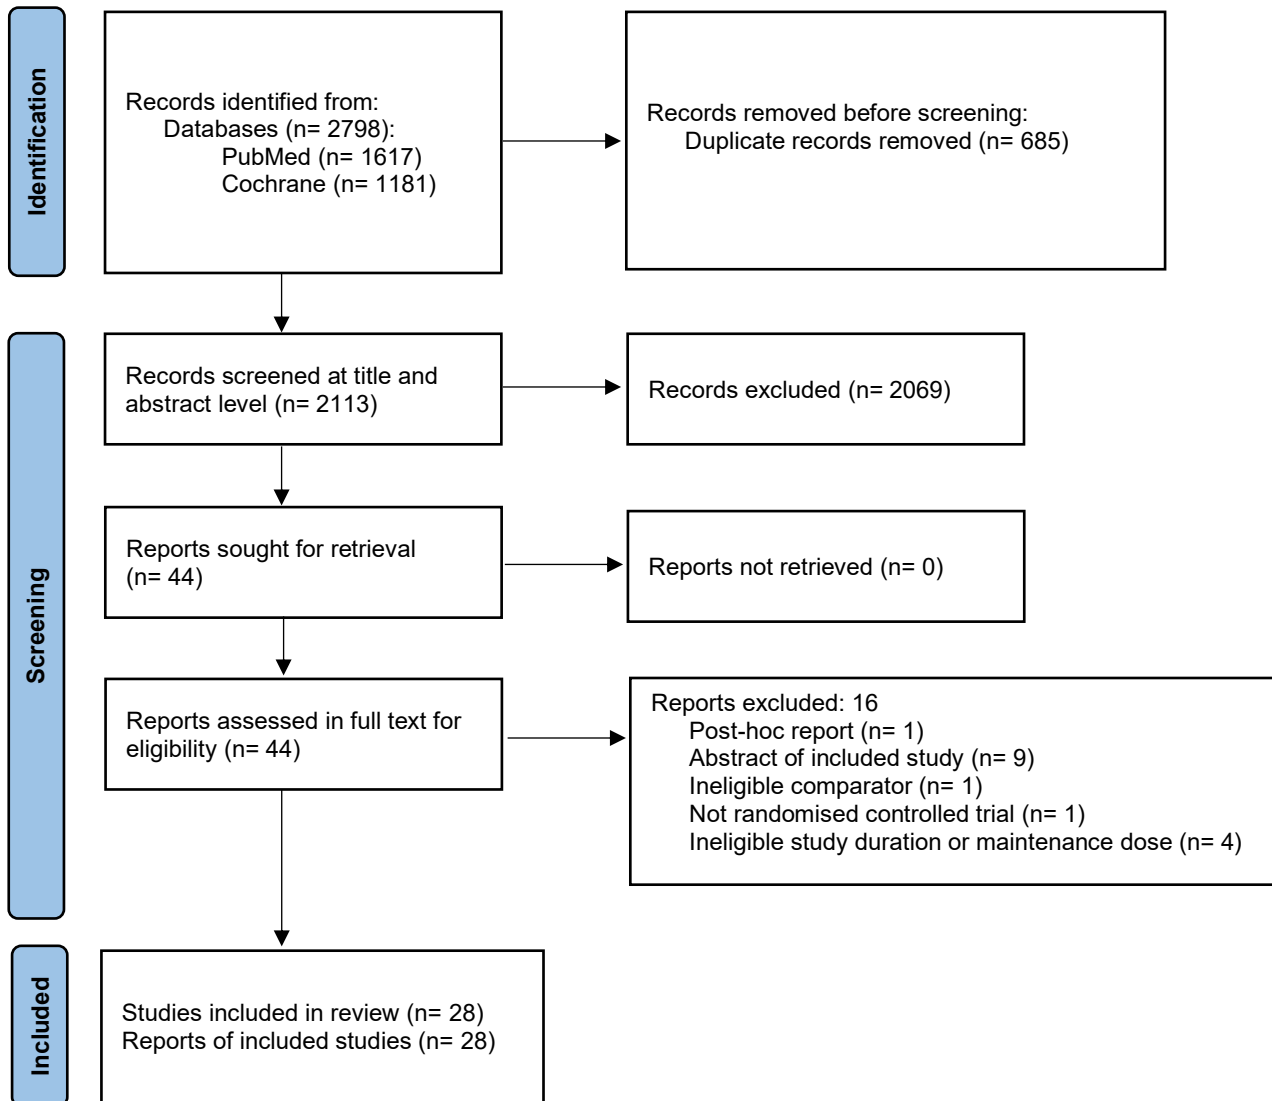

**ESM Fig. 2** Assessment of transitivity based on the distribution of mean baseline HbA1c (%)

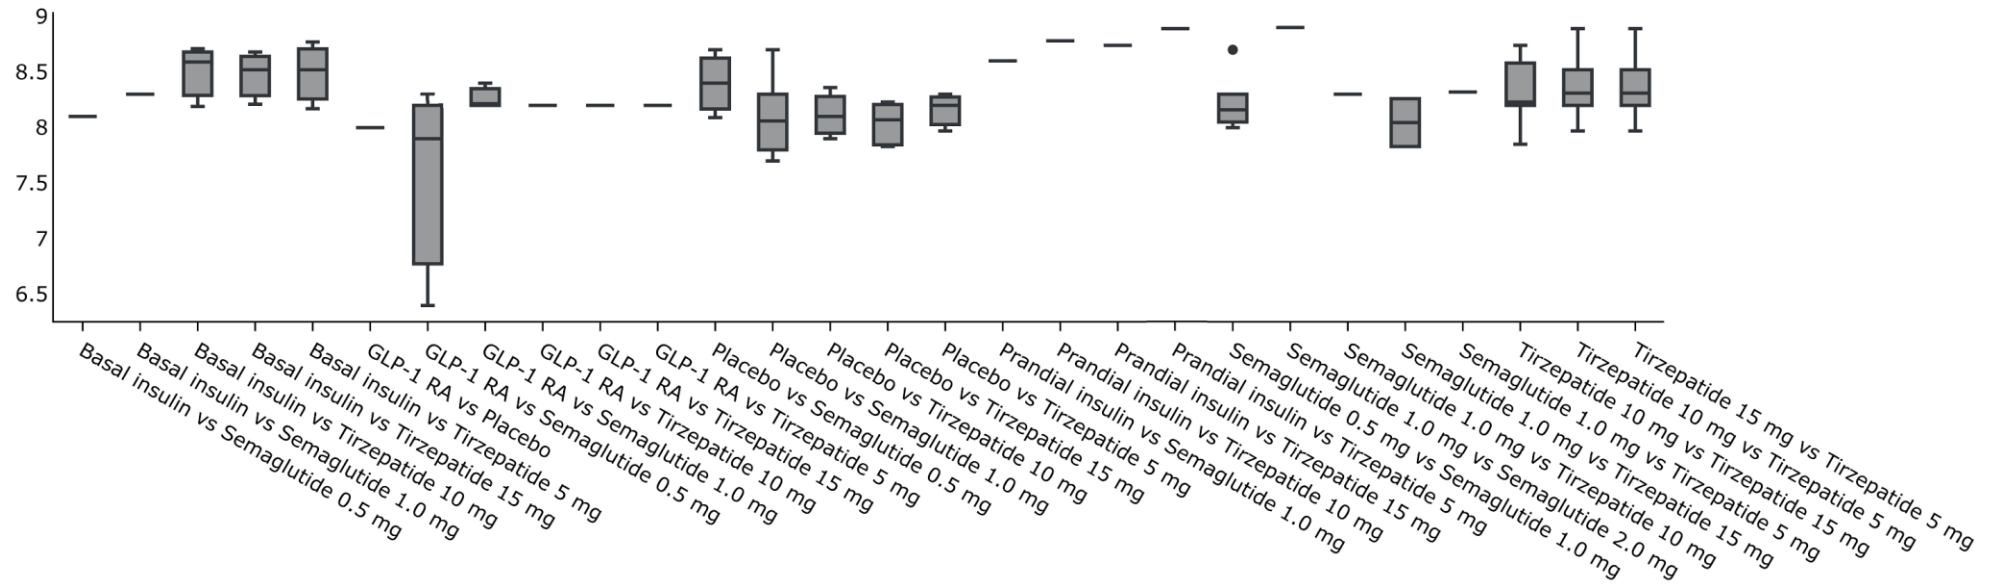

**ESM Fig. 3** Assessment of transitivity based on the distribution of mean baseline body weight (kg)

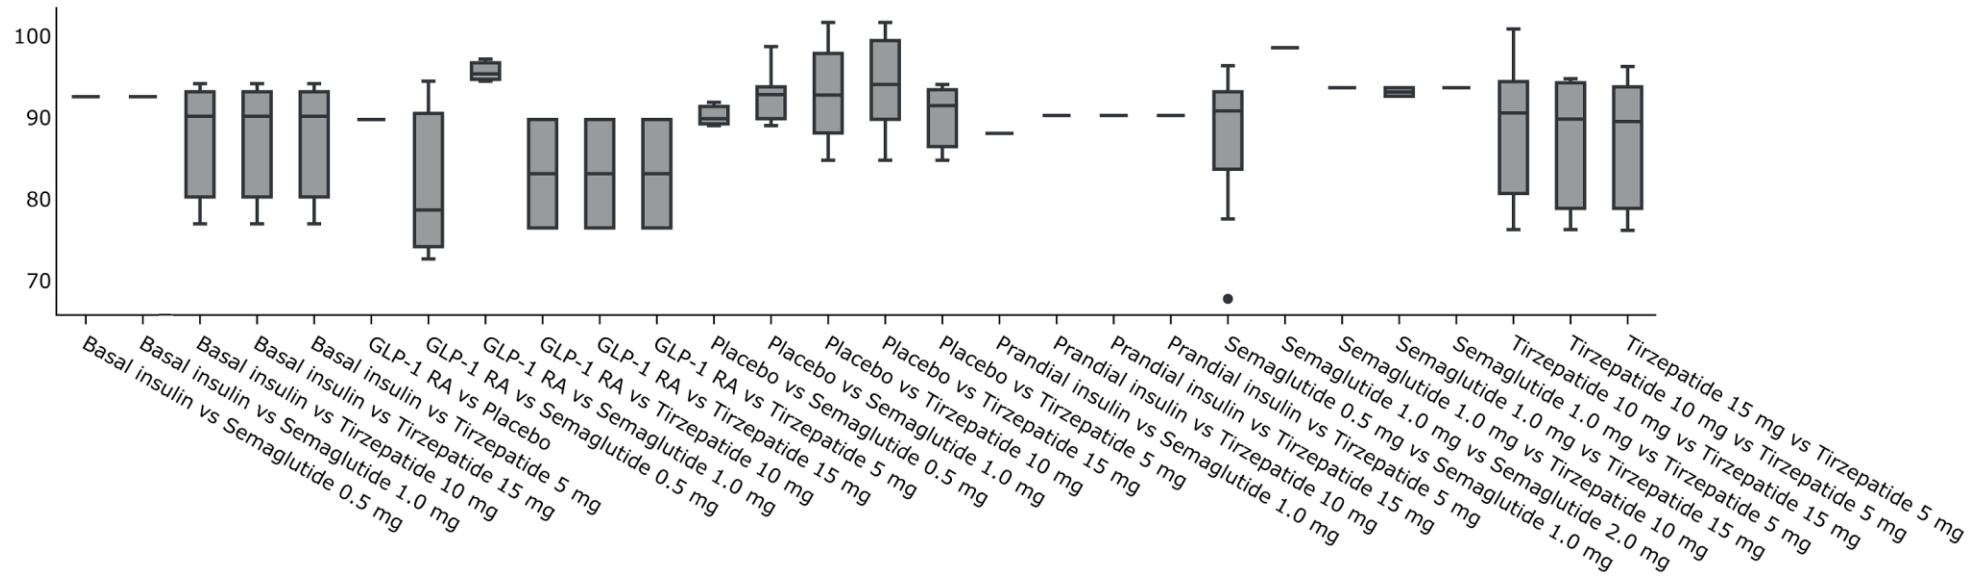

**ESM Fig. 4** Comparison-adjusted funnel plot for the change from baseline in HbA1c (mmol/mol)

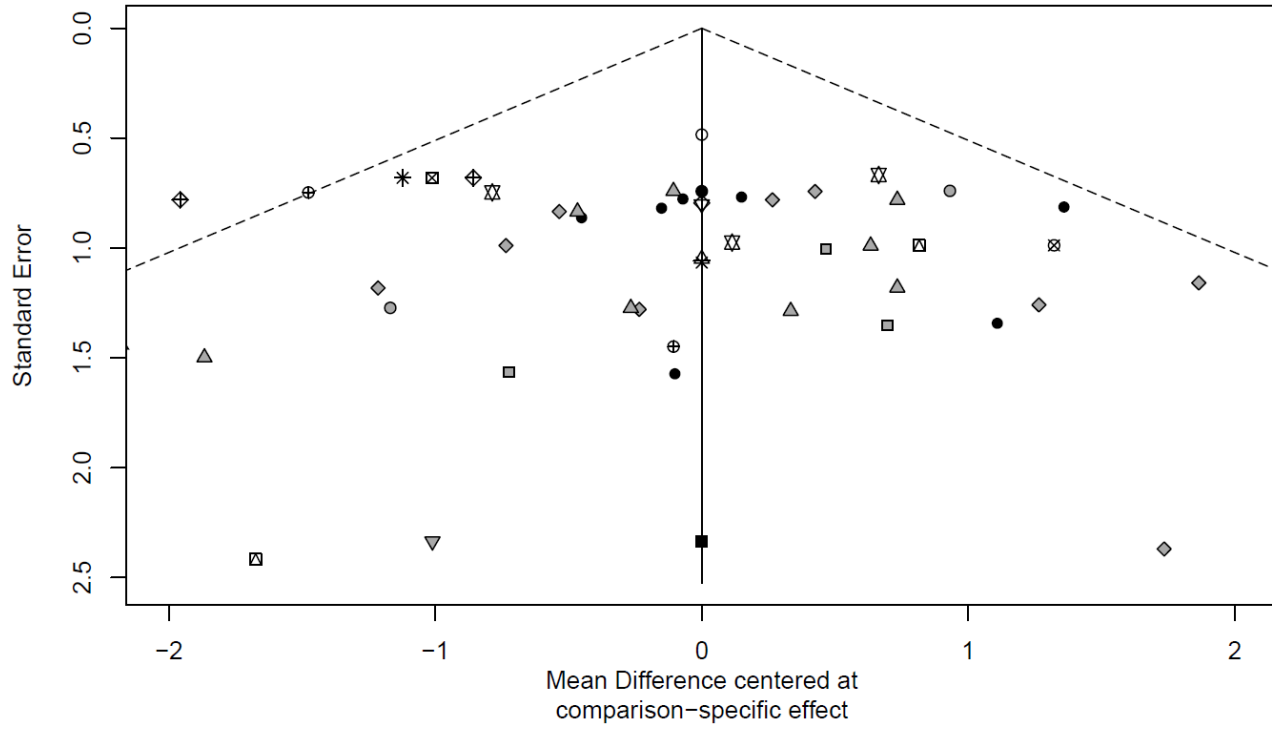



ESM Fig. 5 Comparison-adjusted funnel plot for the change from baseline in body weight (kg)

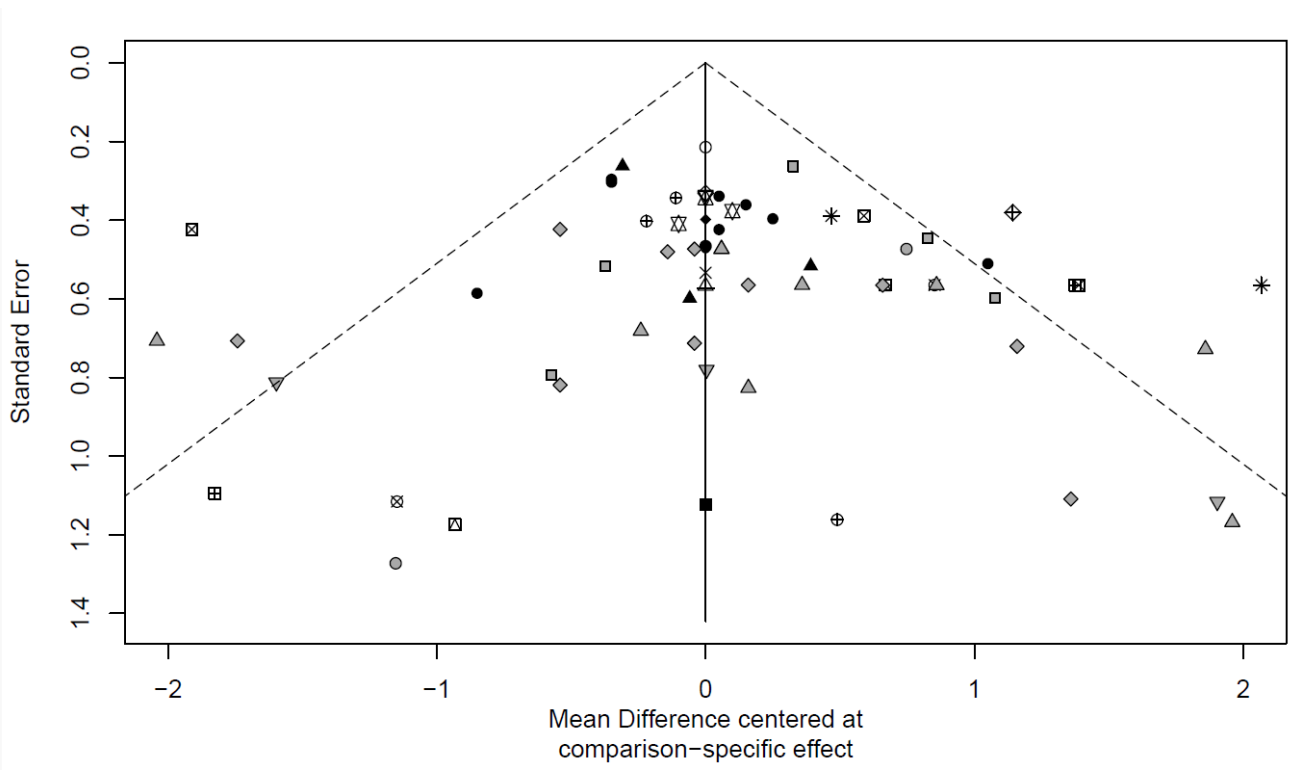

**ESM Fig. 6** Network meta-analysis results compared to placebo for the change from baseline in HbA1c (%). MD, mean difference

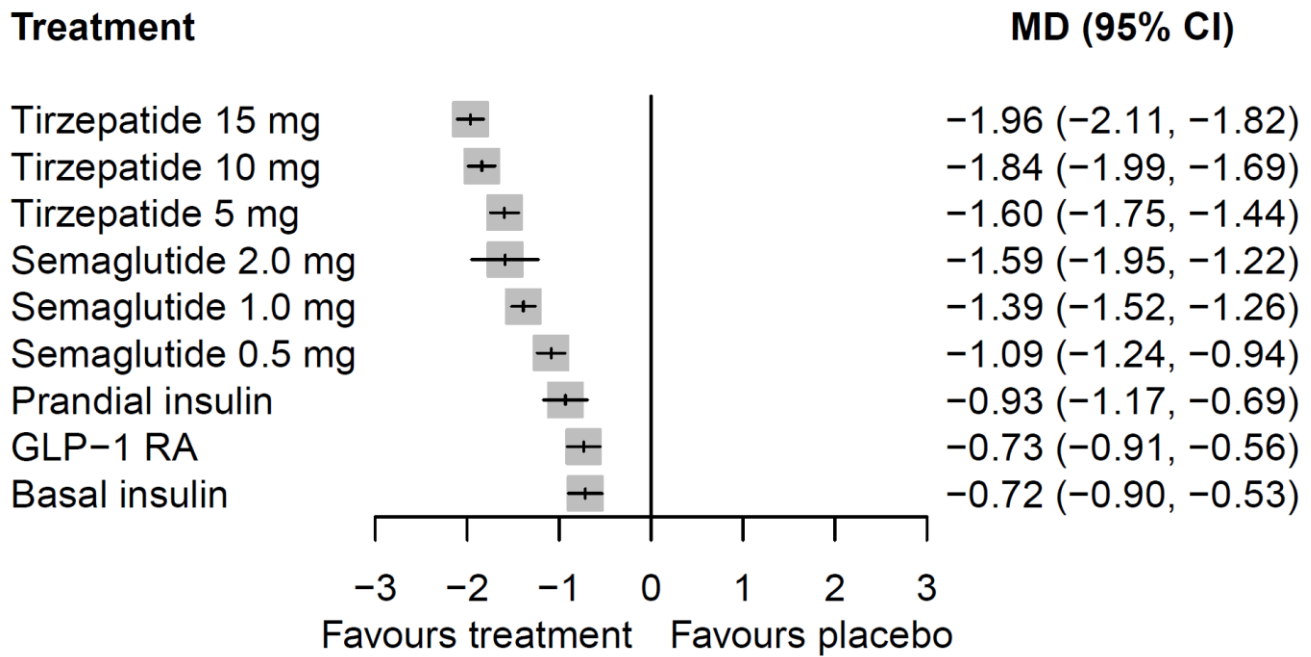

**ESM Fig. 7** Treatment ranking (P-scores) for the change from baseline in HbA1c (mmol/mol). P-scores range from 0 to 1 to and can be interpreted as an average degree of probability for a treatment to be better than the other treatments in the network

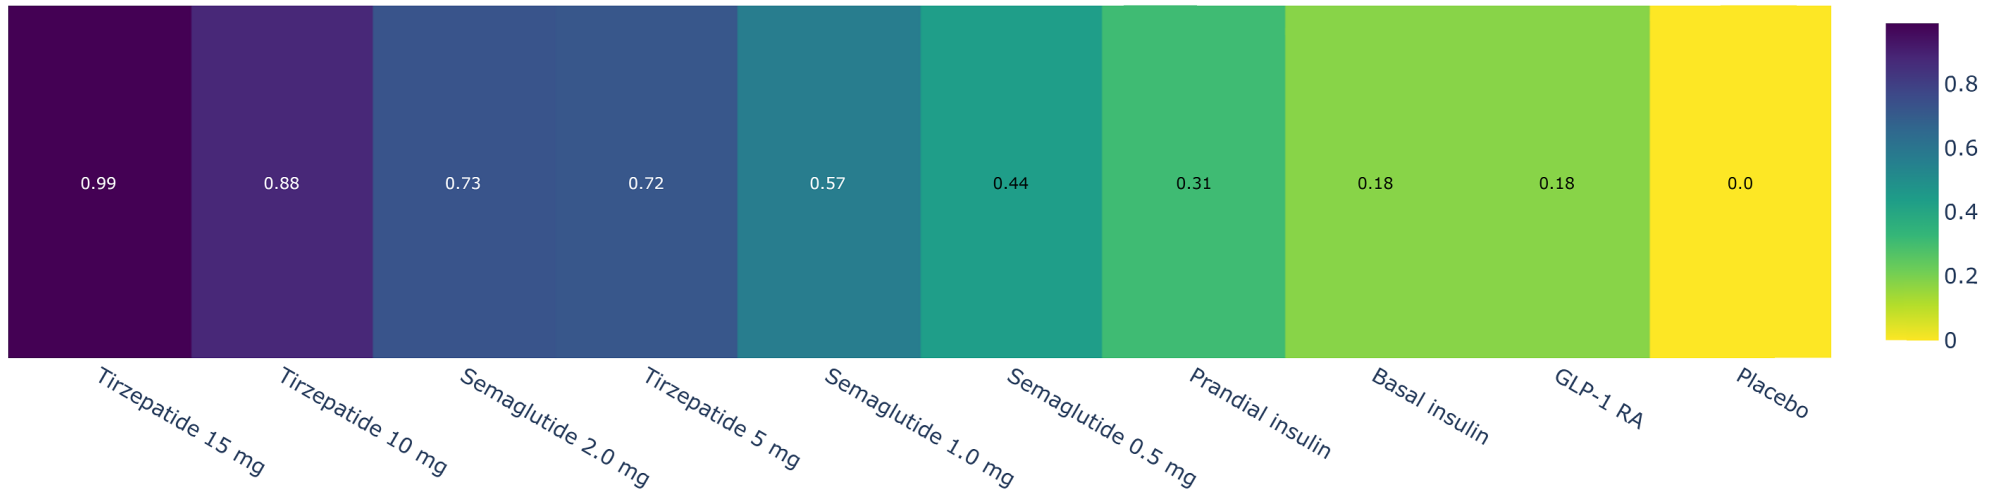

**ESM Fig. 8** Treatment ranking (P-scores) for the change from baseline in body weight (kg). P-scores range from 0 to 1 to and can be interpreted as an average degree of probability for a treatment to be better than the other treatments in the network

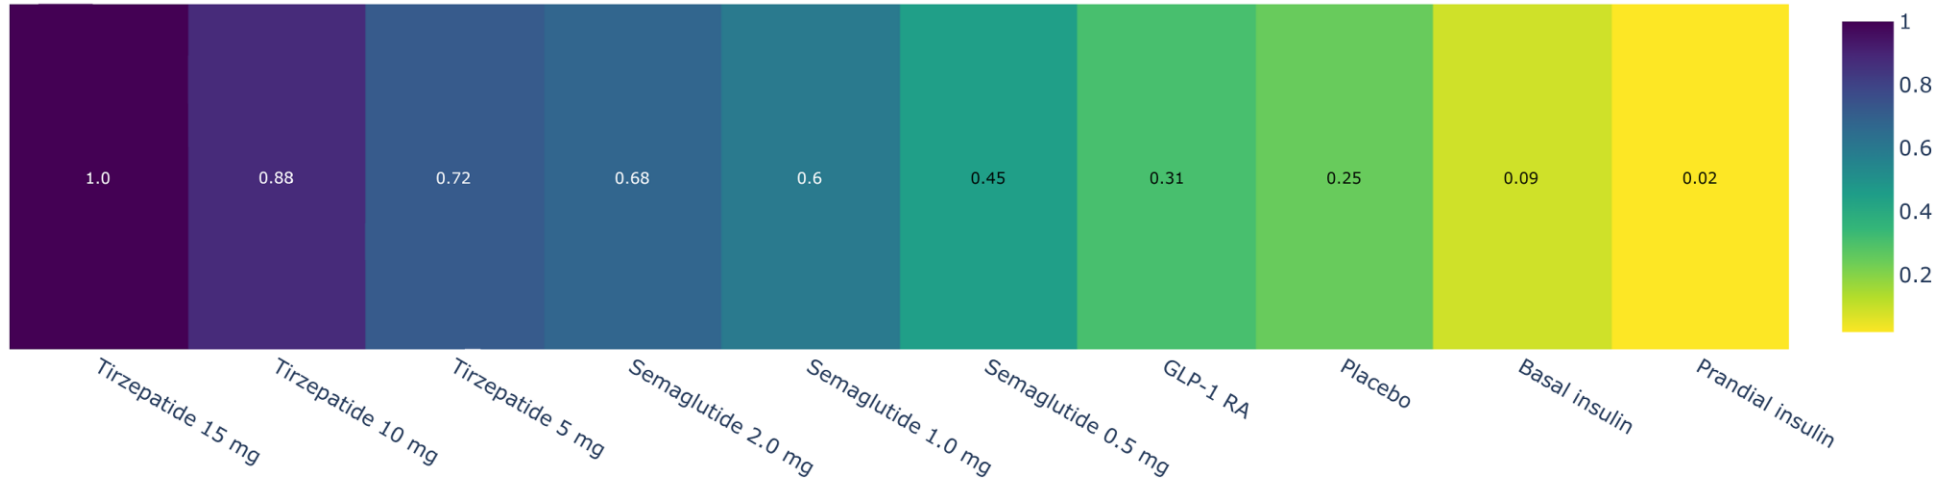

ESM Fig. 9 Network meta-analysis results compared to placebo for the incidence of nausea. RR, risk ratio

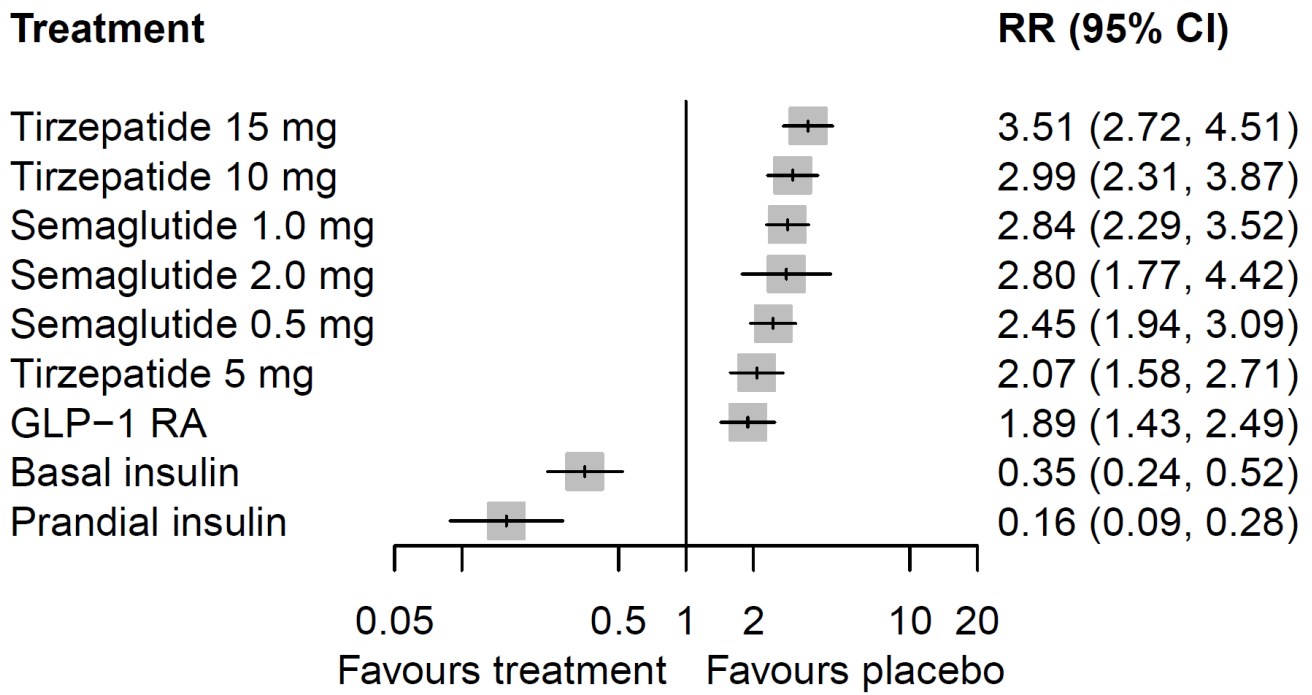

ESM Fig. 10 Network meta-analysis results compared to placebo for the incidence of vomiting. RR, risk ratio

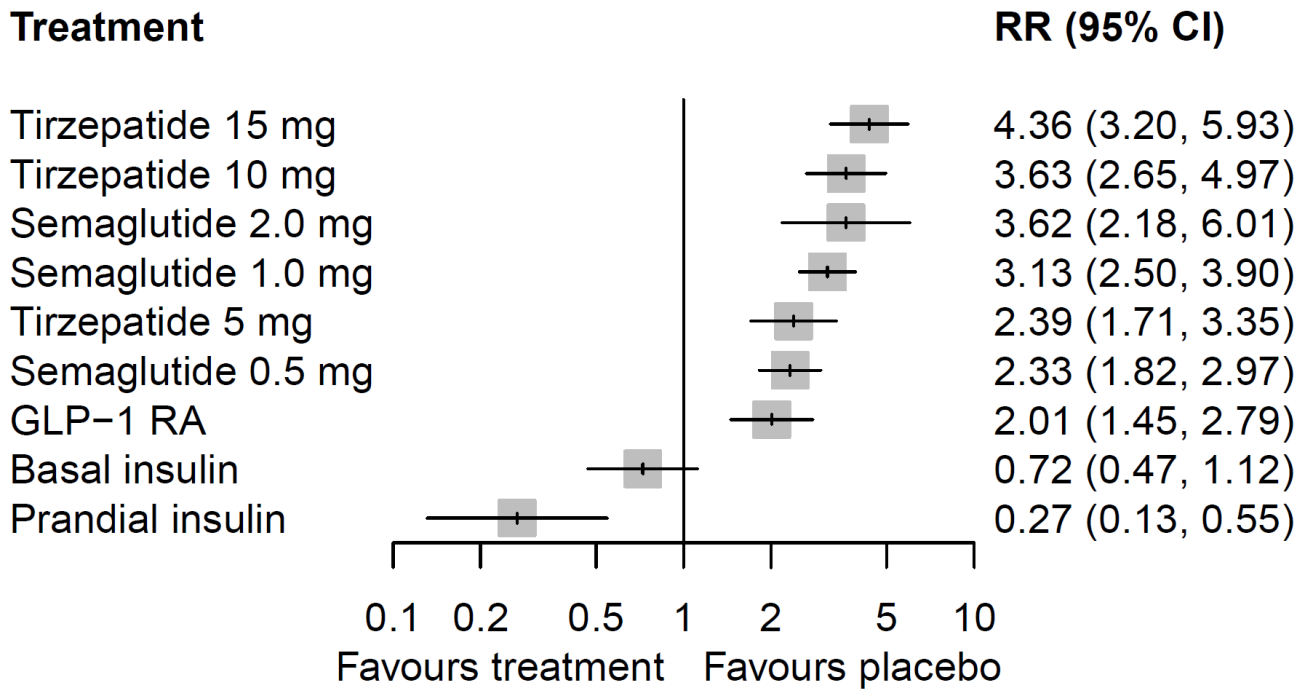

ESM Fig. 11 Network meta-analysis results compared to placebo for the incidence of diarrhoea. RR, risk ratio

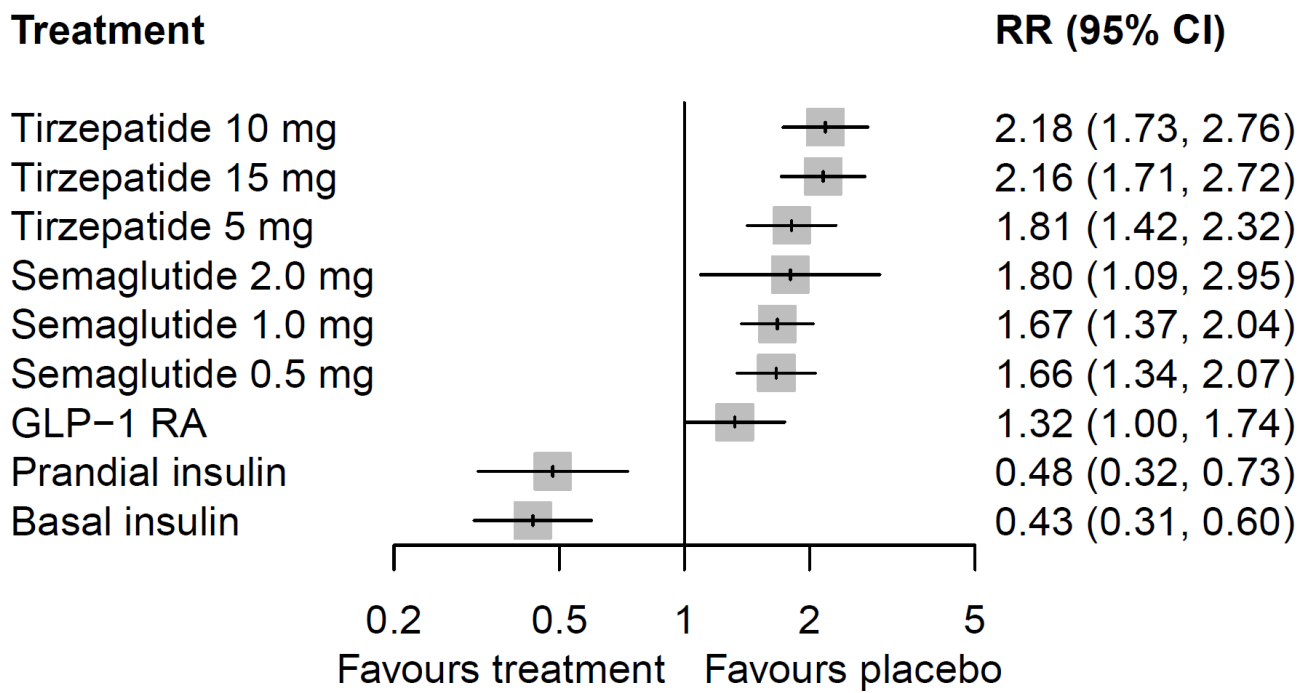

**ESM Fig. 12** Network meta-analysis results compared to placebo for the incidence of serious adverse events.  
RR, risk ratio

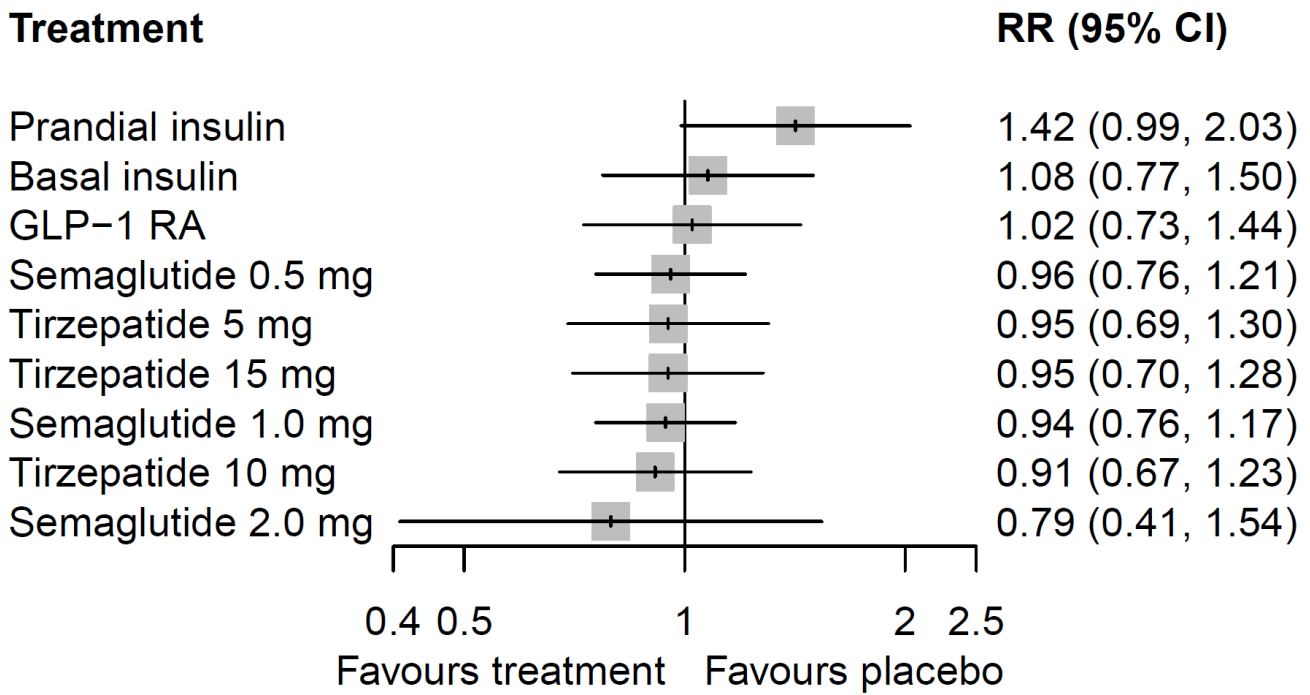

Supplement: MOESM1 [file 26975804]
